# Supplementary material for: The LORF5 Gene Is Non-essential for Replication but Important for Duck Plague Virus Cell-to-Cell Spread Efficiently in Host Cells
Source: PubMed Central journal article supplement (PMC8674210; doi:10.3389/fmicb.2021.744408), 2021-12-02

# Original image data used in the article

Figure 2B

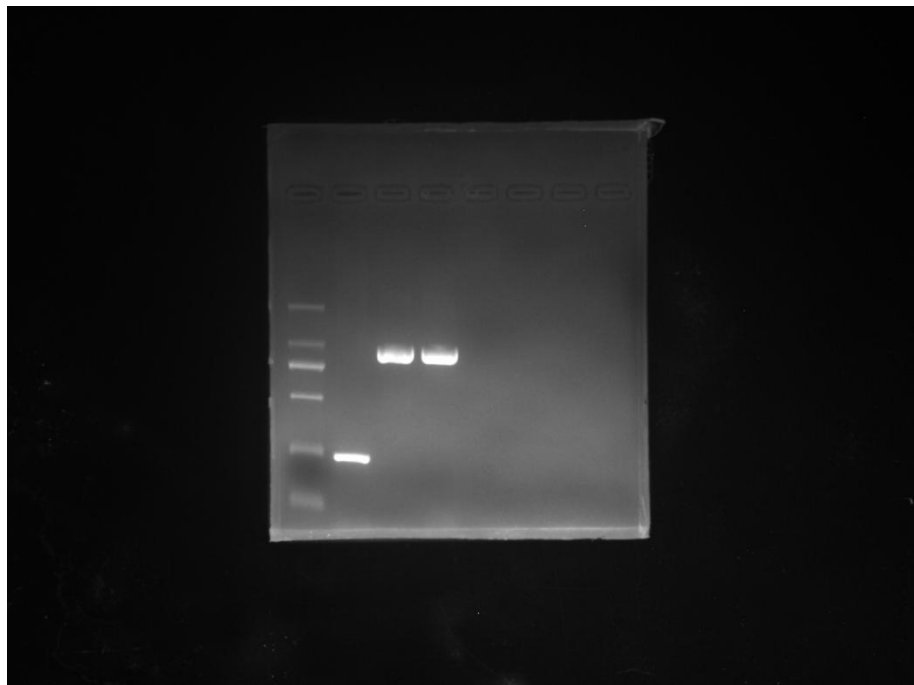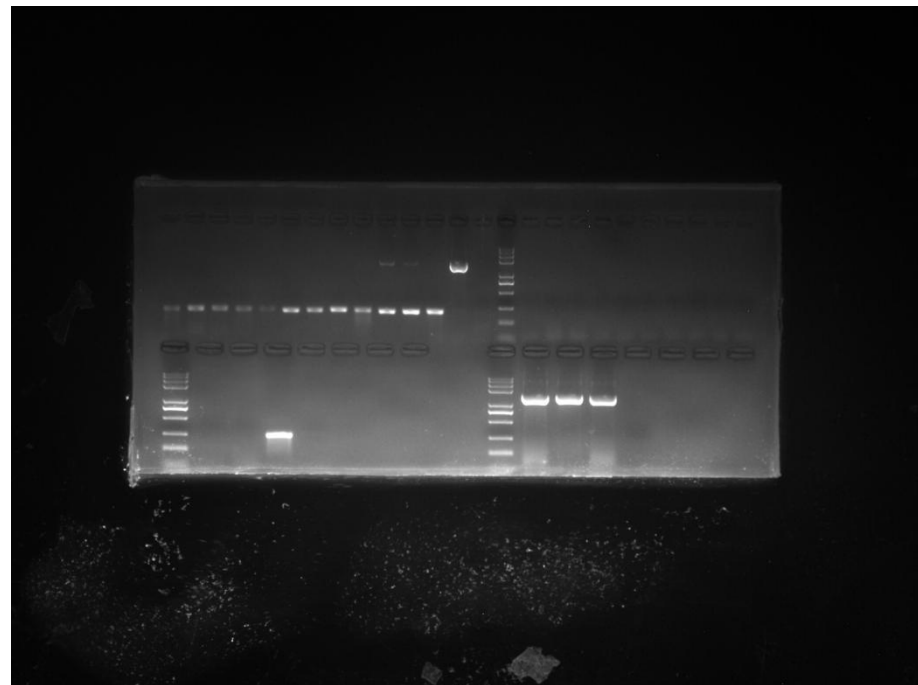

Figure 2C

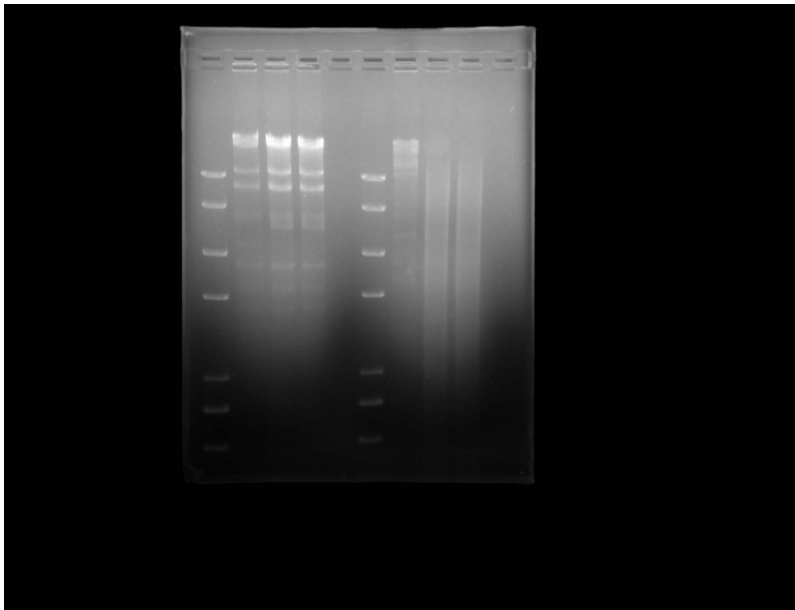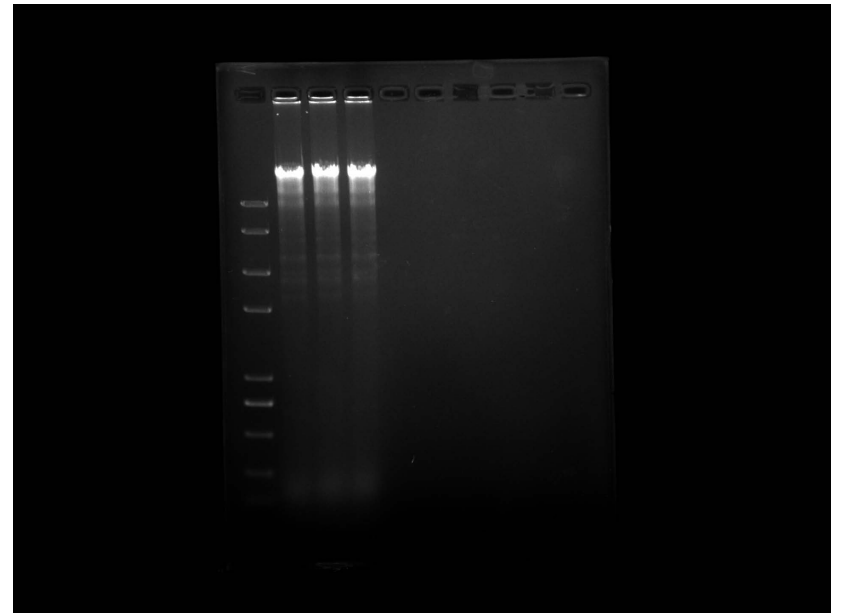

Figure 5A

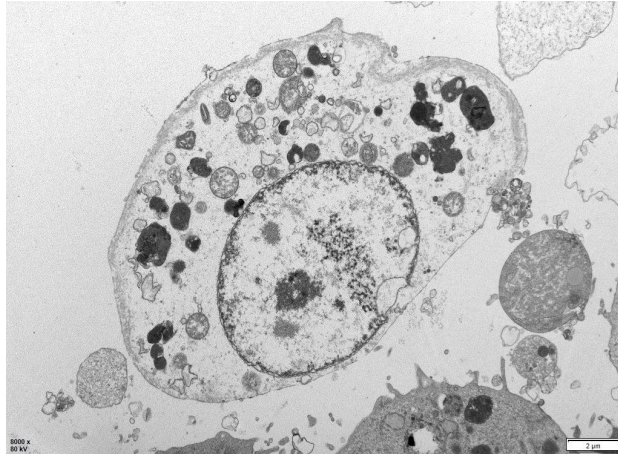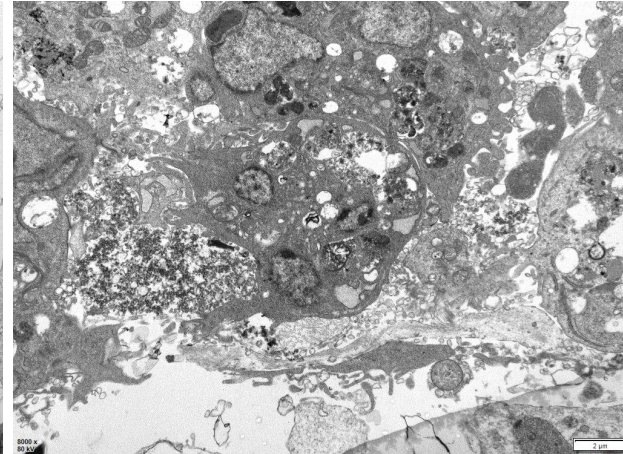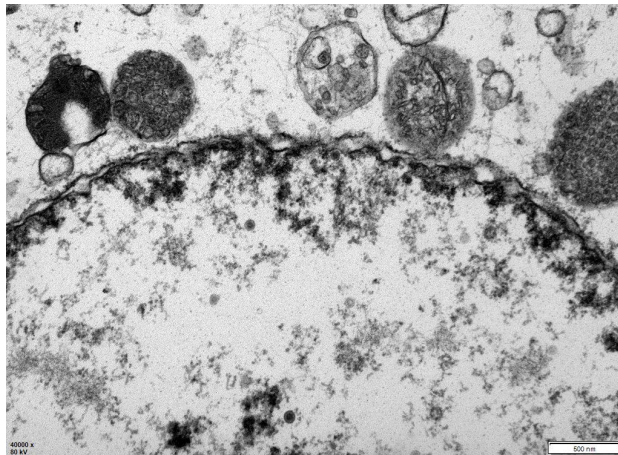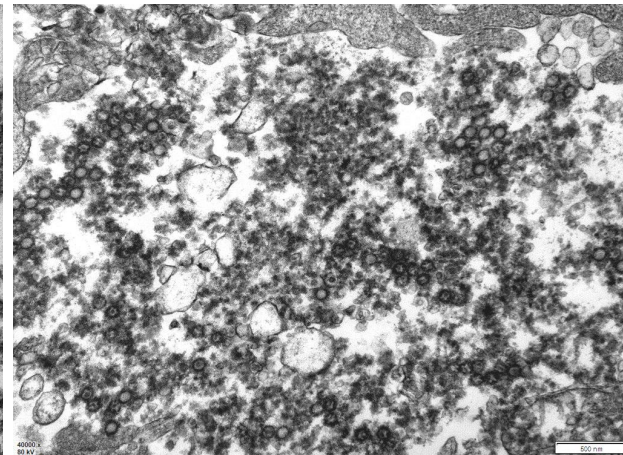

Figure 6 (CHv-BAC- $\Delta$ LORF5)

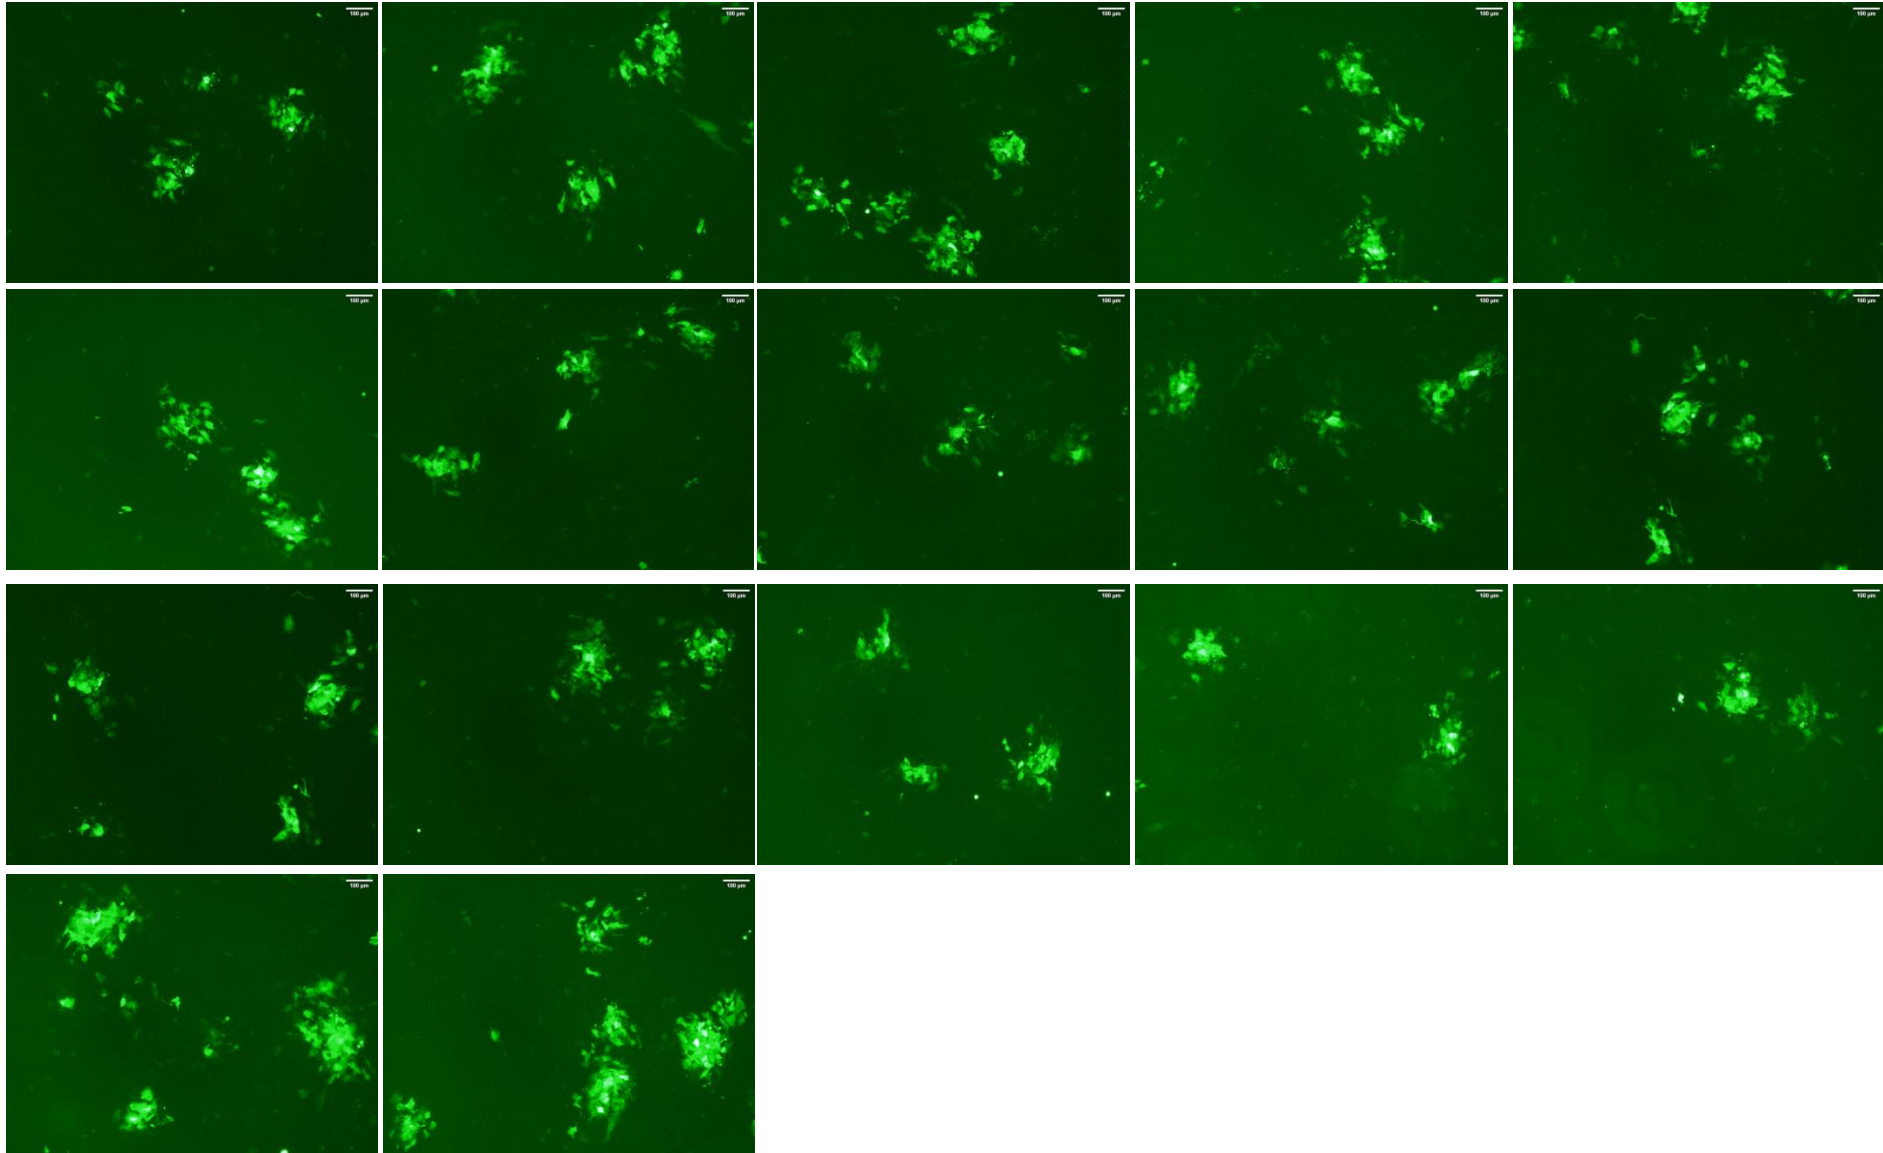

Figure 6 (CHv-BAC-R $\Delta$ LORF5)

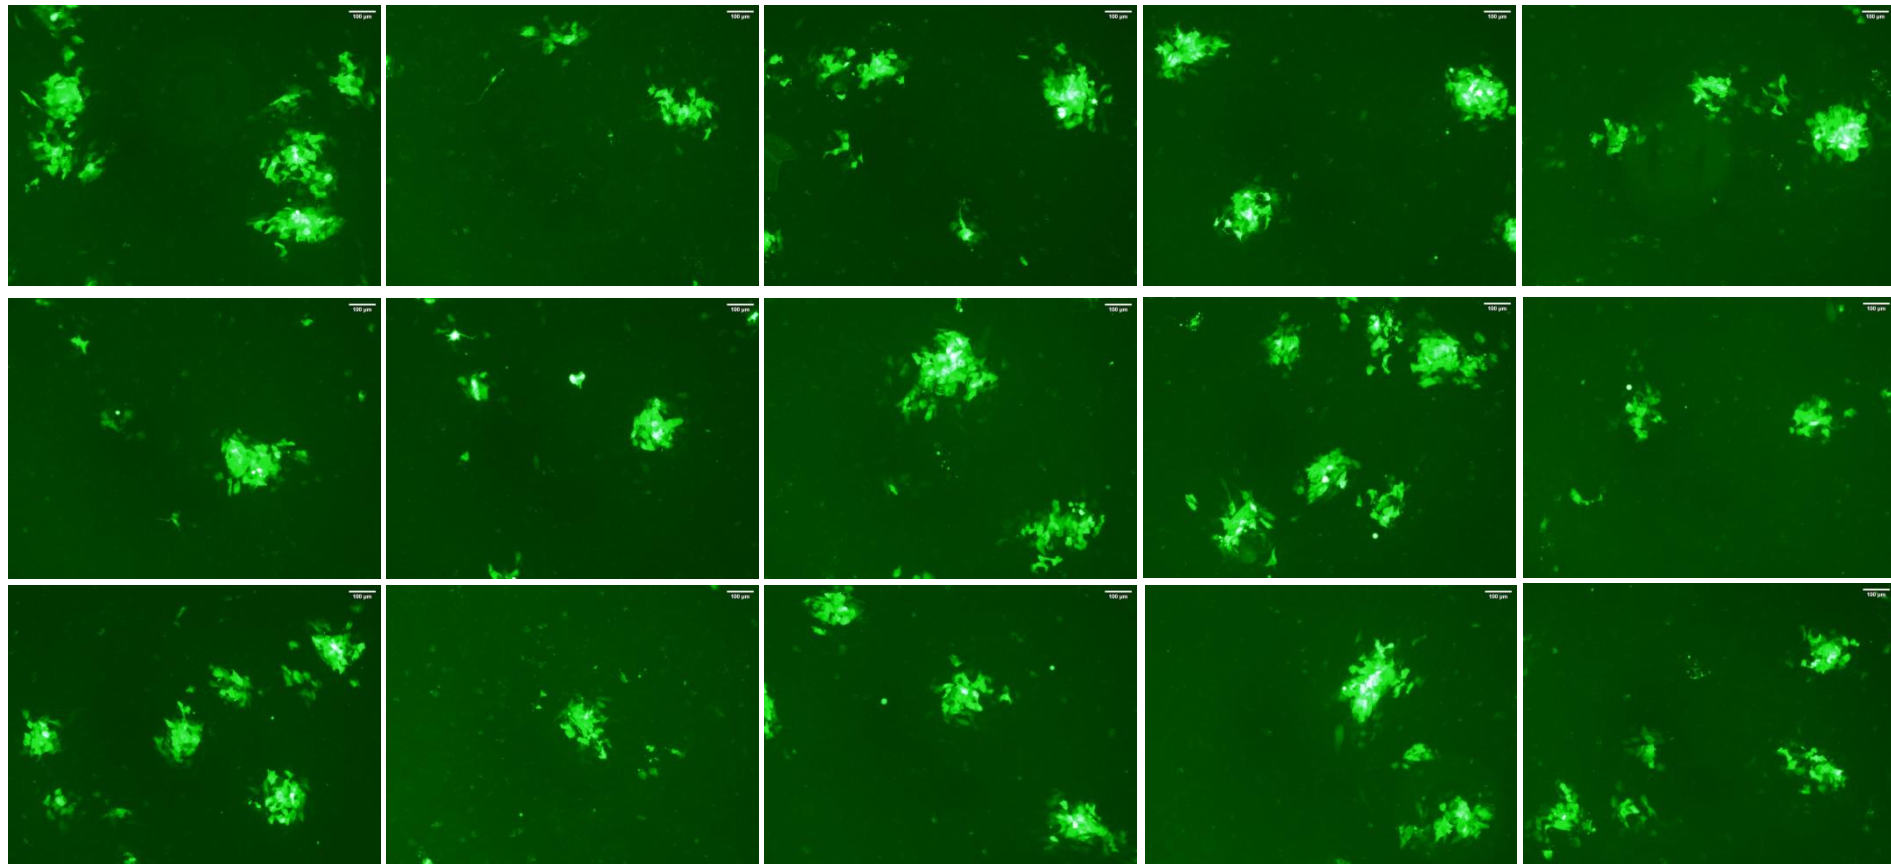

Figure 6 (CHv-BAC)

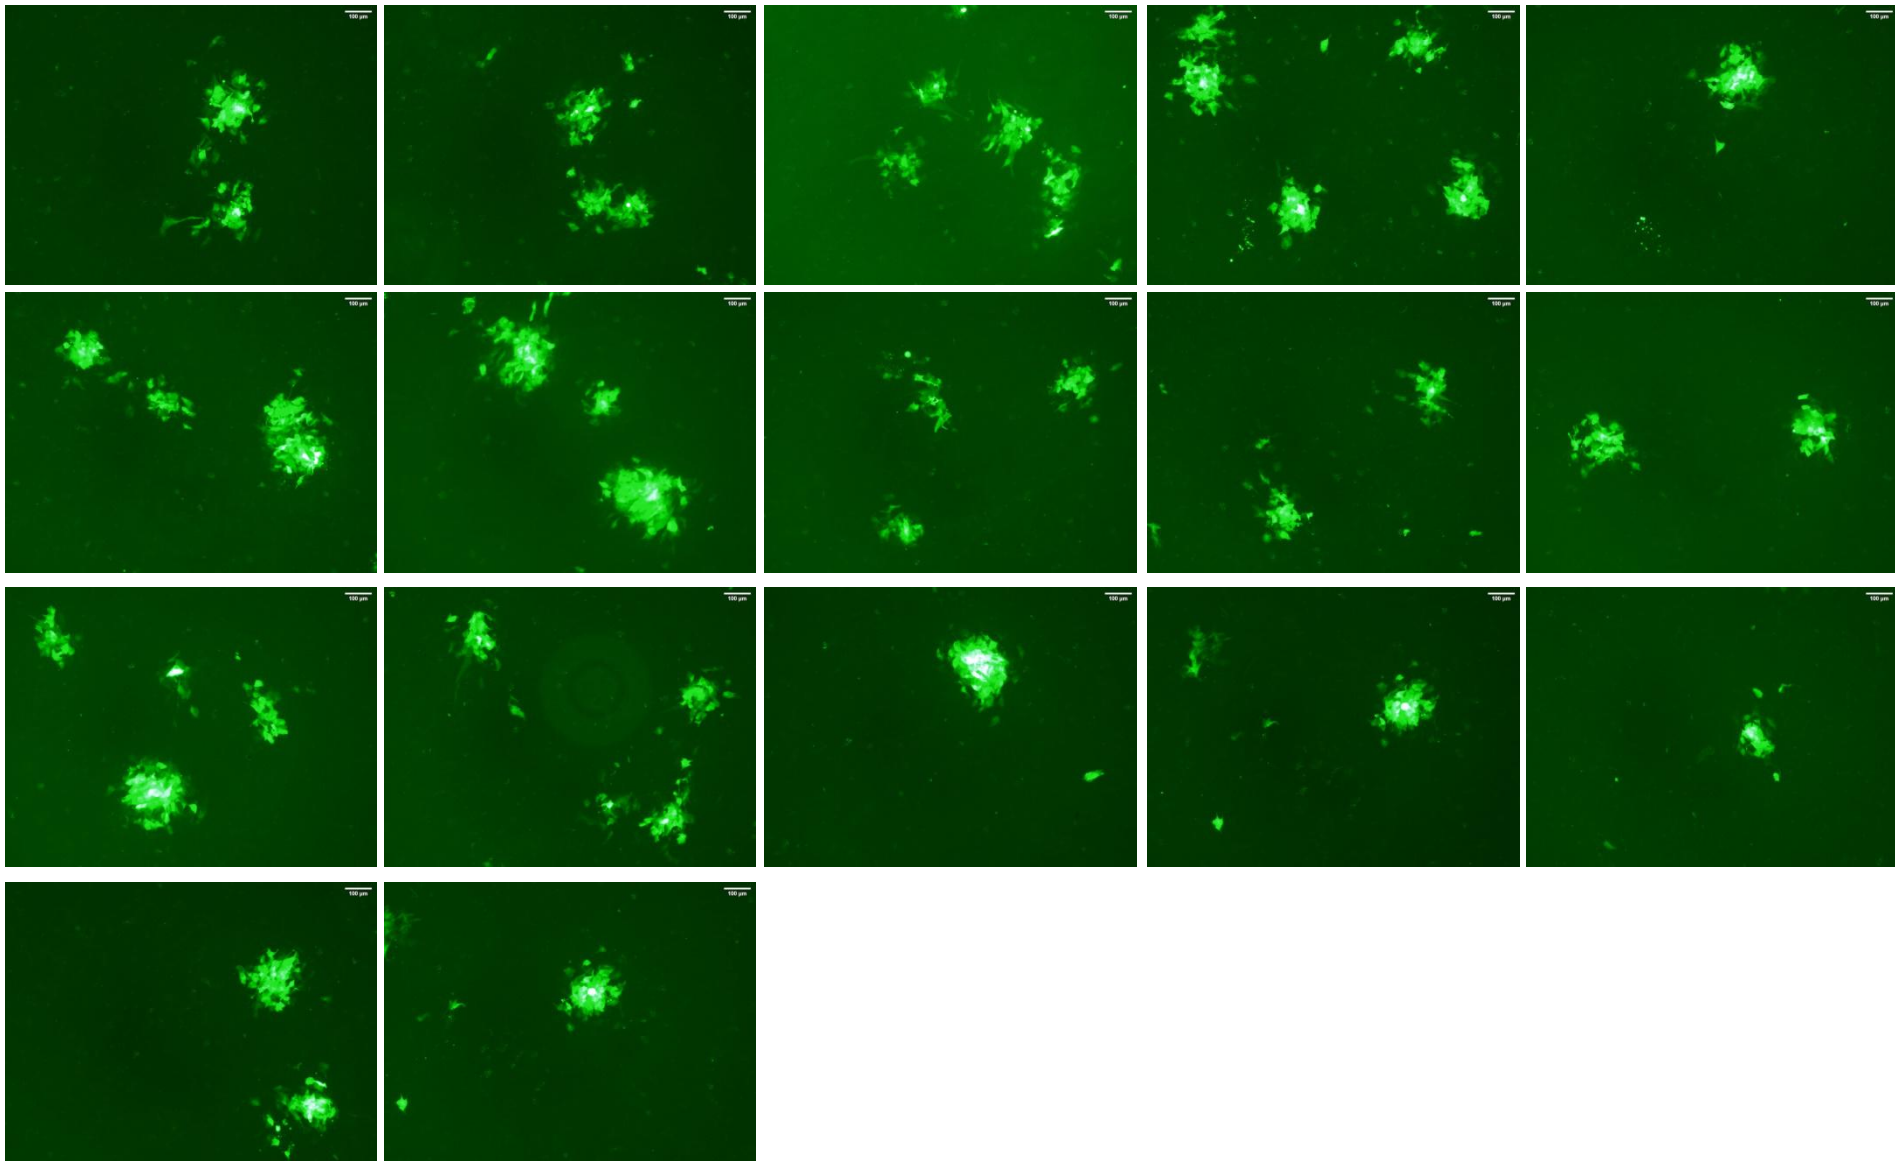

Supplement: Data_Sheet_1.pdf [file Data_Sheet_1.pdf]
